# Supplementary material for: Thermal conductivity of hexagonal BC2P – a first-principles study
Source: Royal Society of Chemistry journal article supplement (doi:10.1039/d0ra08444a), 2020-01-01
Supplement: d0ra08444a1.pdf [file d0ra08444a1.pdf]

Supplementary Information

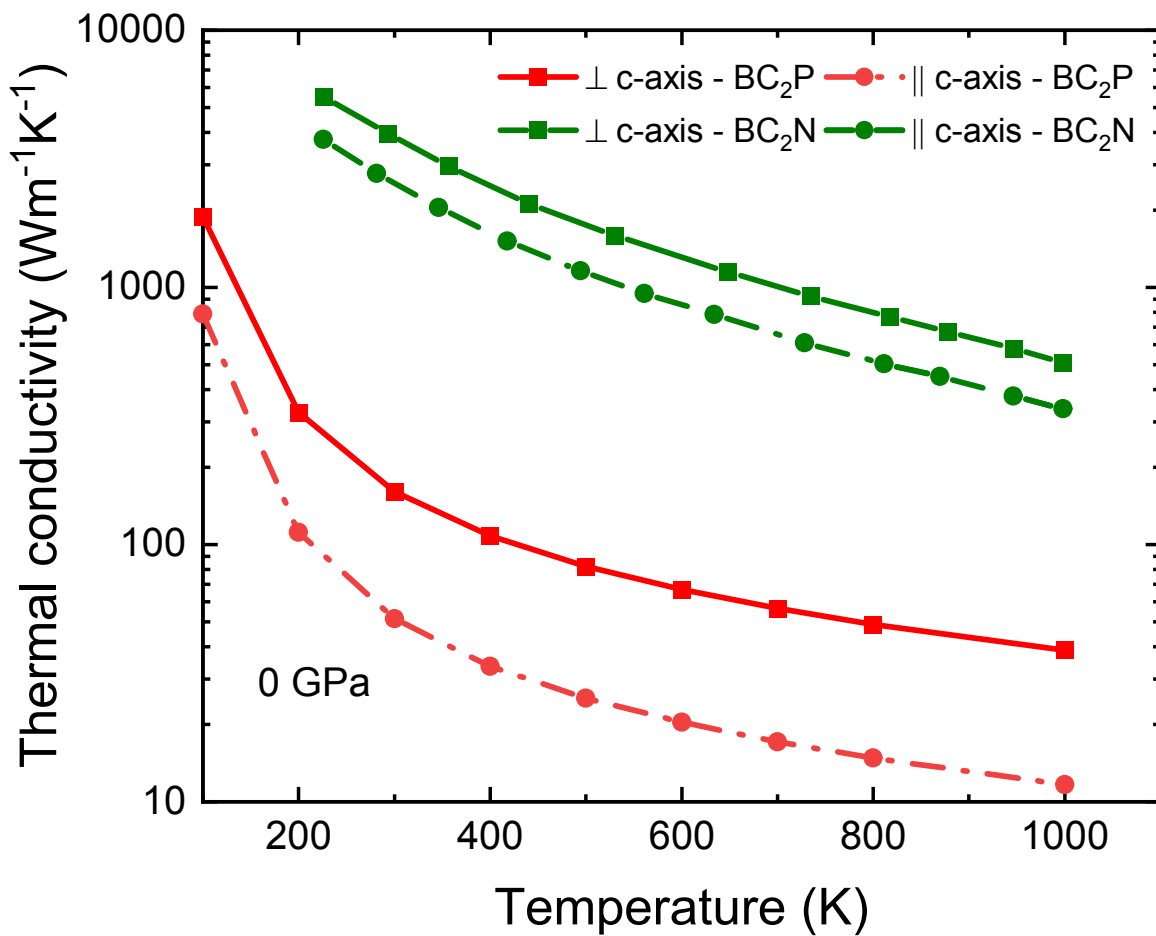

Figure S1: Thermal conductivity of hexagonal BC<sub>2</sub>P and BC<sub>2</sub>N along in-plane and out-of-plane directions at 0 GPa
